# Supplementary material for: Pre-Gondwanan-breakup origin of Beauprea (Proteaceae) explains its historical presence in New Caledonia and New Zealand
Source: PubMed Central journal article supplement — Sci Adv. 2016 Apr 29;2(4):e1501648. doi: 10.1126/sciadv.1501648 (PMC4928934; doi:10.1126/sciadv.1501648), 2016-04-29
Supplement: 1501648_SM.pdf [file 1501648_SM.pdf]

## Supplementary Materials for

### **Pre-Gondwanan-breakup origin of *Beauprea* (Proteaceae) explains its historical presence in New Caledonia and New Zealand**

Tianhua He, Byron B. Lamont, Bruno Fogliani

Published 29 April 2016, *Sci. Adv.* **2**, e1501648 (2016)

DOI: 10.1126/sciadv.1501648

#### **The PDF file includes:**

- table S1. Numerical states for 11 pollen characters assessed on eight *Beauprea* species, five fossil pollen types, and four other extant genera in the same subfamily (Proteoideae) as *Beauprea*.
- table S2. Species, voucher information, and GenBank accession for all sequences included in this study.

## Supplementary Materials

table S1. Numerical states for 11 pollen characters assessed on eight *Beauprea* species, five fossil pollen types, and four other extant genera in the same subfamily (Proteoideae) as *Beauprea*. All characters were assessed on individual species, except that values for the non-*Beauprea*-related pollen types were mostly taken from Sauquet *et al.* (42).

| Taxon                    | 1     | 2   | 3 | 4   | 5 | 6 | 7 | 8   | 9 | 10 | 11 |
|--------------------------|-------|-----|---|-----|---|---|---|-----|---|----|----|
| <i>Beauprea</i>          |       |     |   |     |   |   |   |     |   |    |    |
| <i>asplenioides</i>      | 2     | 2   | 0 | 0   | 3 | 0 | 0 | 5   | 1 | 1  | 0  |
| <i>Beauprea balansae</i> | 2     | 2   | 0 | 0/1 | 3 | 1 | 0 | 2   | 0 | 1  | 0  |
| <i>Beauprea</i>          |       |     |   |     |   |   |   |     |   |    |    |
| <i>comptonii</i>         | 2     | 2   | 0 | 0   | 3 | 0 | 0 | 4   | 0 | 1  | 0  |
| <i>Beauprea filipes</i>  | 2     | 2   | 0 | 0   | 3 | 0 | 0 | 3   | 0 | 1  | 0  |
| <i>Beauprea gracilis</i> | 2     | 1   | 0 | 0   | 3 | 0 | 0 | 2   | 0 | 1  | 0  |
| <i>Beauprea montana</i>  | 3     | 1   | 0 | 0   | 3 | 1 | 0 | 2   | 0 | 1  | 0  |
| <i>Beauprea</i>          |       |     |   |     |   |   |   |     |   |    |    |
| <i>montisfontium</i>     | 1/2   | 2/3 | 0 | 1/3 | 3 | 1 | 0 | 1/2 | 0 | 1  | 0  |
| <i>Beauprea</i>          |       |     |   |     |   |   |   |     |   |    |    |
| <i>spathulifolia</i>     | 2     | 0/1 | 0 | 0/1 | 3 | 0 | 0 | 4   | 0 | 1  | 0  |
| <i>Beaupreaidites</i>    |       |     |   |     |   |   |   |     |   |    |    |
| <i>diversiformis</i>     | 1/2/3 | 1   | 0 | 1   | 3 | 0 | 0 | 1/2 | 1 | 1  | 0  |
| <i>Beaupreaidites</i>    | 1/2/3 | 1   | 0 | 0/1 | 3 | 0 | 0 | 1/4 | 0 | 1  | 0  |

*elegansiformis*

*Beaupreaidites*

*orbiculatus*            1/2      1/2      0      3      3      1      0      2      0      1      0

*Cranwellipollis*

*palisadus*            1/2      2/3      0      1      0      0      0      6      3      0      1

*Eidothea* sp.        2/3      1      3      0/1      0      0      1      0      0      0      0

*Franklandia*

*triaristata*        2/3/4/5    2/3      0      0/1/2    0      0      0      6      3      0      1

*Faurea* spp.        0/1      1      0/1/2/3    0/1    0/1/2    0    1/2    1/4    1      0      0

*Peninsulapollis*

*gillii*              0/1      1      0      2/3      3      0      0      4      1      1      0

*Protea* spp.        0/1      1/2      1/3      0/1      1/2      0      2      0/1/4    0/1    0      0

---

Pollen characters scored:

1. Pollen length [L] (distance between two pores): (0) very small (0 to 20  $\mu\text{m}$ ); (1) small (20 to 40  $\mu\text{m}$ ); (2) average (40 to 60  $\mu\text{m}$ ); (3) large (60 to 80  $\mu\text{m}$ ); (4) very large (80 to 100  $\mu\text{m}$ ); (5) huge (100 to 200  $\mu\text{m}$ ).
2. Pollen shape (outline in polar view): (0) distinctly concave; (1) more or less straight; (2) distinctly convex; (3) globose.
3. Polarity (outline in equatorial view): (0) isopolar (apertures in median equatorial plane); (1) anisopolar (apertures and proximal pole in the same plane); (2) strongly anisopolar (apertures below the proximal pole); (3) subisopolar (apertures below median equatorial plane).

4. Relative aperture size [ $A/L$  where  $A$  = aperture size]: (0) narrow (0% to 12%); (1) average (12% to 20%); (2) wide (20% to 30%); (3) huge (30% to 100%).
5. Aperture shape (outline in top view): (0) circular; (1) ellipsoid-lolongate; (2) slit-shaped; (3) colpoid; (4) lalongate; (5) colpate.
6. Supratectal gemmae scattered over surface: (0) no; (1) yes.
6. Tectum: (0) continuous to microperforate; (1) perforate; (2) foveolate; (3) reticulate; (4) verruco-areolate to rugulate; (5) clavate/gemmate; (6) semi-tectate.
7. Tectum homogeneity and polarity: (0) homogeneous and homopolar; (1) more or less heteropolar; (2) more or less heterogeneous.
8. Tectal microsculpture: (0) smooth; (1) perforate; (2) reticulate; (3) scabrate; (4) rugulate-areolate-granulate-pustulate; (5) verrucate; (6) clavate.
9. Relative exine thickness [ $E/L$  where  $E$  = exine thickness]: (0) thin (0% to 4%); (1) average (4% to 7%); (2) thick (7% to 10%); (3) very thick (10% to 20%).
10. Nexine dissolution at margin of pore: (0) absent; (1) present.
11. Continuity of tectum: (0) tectate; (1) intectate - baculate.

table S2. Species, voucher information, and GenBank accession for all sequences included in this study.

| Taxon                                          | <i>matK</i> | <i>ITS</i> | <i>rbcL</i> | <i>rpl16</i> | <i>trnL-trnF</i> | <i>trnLi</i> | <i>atpB-rbcL</i> | <i>atpB</i> | Voucher* |
|------------------------------------------------|-------------|------------|-------------|--------------|------------------|--------------|------------------|-------------|----------|
| <i>Franklandia triaristata</i>                 |             |            |             | KT956876     | KT956881         | KT956892     |                  | KT956855    | PP2014   |
| <i>Beauprea asplenoides</i> Schltr.            |             | KT956863   |             |              | KT956882         | KT956893     |                  |             | PPNC07   |
| <i>Beauprea congesta</i> Viot.                 |             |            | KT956870    |              | KT956883         | KT956894     | KT956850         | KT956856    | PPNC12   |
| <i>Beauprea filipes</i> Schltr.                | KT956868    |            | KT956871    |              | KT956884         | KT956895     | KT956851         | KT956857    | PPNC08   |
| <i>Beauprea gracilis</i> Brongn. & Gris        | KT956869    | KT956864   | KT956872    | KT956877     | KT956885         | KT956896     | KT956852         | KT956858    | PPNC01   |
| <i>Beauprea montana</i> (Brongn. & Gris) Viot. |             | EU676065   | KT956873    |              | KT956886         | KT956897     | AF060749         | KT956859    | PPNC09   |
| <i>Beauprea montisfontium</i> Guillaumin       |             | KT956865   |             |              | KT956887         | KT956898     |                  |             | PPNC04   |
| <i>Beauprea neglecta</i> Viot                  |             |            |             | KT956878     | KT956888         | KT956899     |                  | KT956860    | PPNC02   |
| <i>Beauprea pancheri</i> Brongn. & Gris        |             |            | KT956874    | KT956879     | KT956889         | KT956900     |                  | KT956861    | PPNC05   |
| <i>Beauprea spathulifolia</i> Brongn. & Gris   |             | KT956866   |             |              | KT956890         | KT956901     | KT956853         |             | PPNC06   |
| <i>Beaupreopsis paniculata</i>                 |             | KT956867   | KT956875    | KT956880     | KT956891         | KT956902     | KT956854         | KT956862    | PPNC11   |
| <i>Eidothea hardeniana</i> (Proteaceae)        |             |            | DQ875826    |              |                  |              | AF061714         | AF060395    |          |
| <i>Cenarrhenes nitida</i> (Proteaceae)         |             | EU676067   | DQ875827    |              |                  |              | AF060746         | AF060396    |          |
| <i>Agastachys odorata</i> (Proteaceae)         | EU169607    |            | DQ875824    |              |                  |              | AF060717         | AF060393    |          |
| <i>Platanus orientalis</i> (Platanaceae)       | AM396503    |            | AY858644    |              | AM397164         | AM397164     |                  |             |          |

|                                        |          |          |          |          |          |
|----------------------------------------|----------|----------|----------|----------|----------|
| <i>Sabia swinhoei</i> (Sabiaceae)      | AM396512 | AM183414 | AM397158 | AM183436 | AF093395 |
| <i>Meliosma cuneifolia</i> (Sabiaceae) | AM396513 | AF206793 | AM397160 |          | AF209626 |
| <i>Nelumbo lutea</i> (Nelumbonaceae)   | AM366514 | DQ182337 | AY145359 | EF377291 | AF528853 |

---

\* Voucher specimens of *Beauprea* species were collected by T. He and B. Lamont, and were deposited in the Herbarium of the IRD Noumea (NOU), New Caledonia. *Franklandia triaristata* was collected by T. He, and was deposited in Biology Herbarium, Curtin University.
